# Supplementary material for: Bionic design for anticoagulant surface via synthesized biological macromolecules with heparin-like chains
Source: Royal Society of Chemistry journal article supplement (doi:10.1039/c5ra06638g), 2015-01-01
Supplement: c5ra06638g1.pdf [file c5ra06638g1.pdf]

### **Supporting Information**

**Manuscript ID:** RA-ART-2015-006638

**Title:** Bionic design for anticoagulant surface via synthesized biological macromolecules with heparin-like chains

**Authors:** Fen Ran\*, Haiming Song, Jiayu Wu, Xiaoqin Niu, Lang Ma, Huili Fan, Long Kang, Changsheng Zhao\*

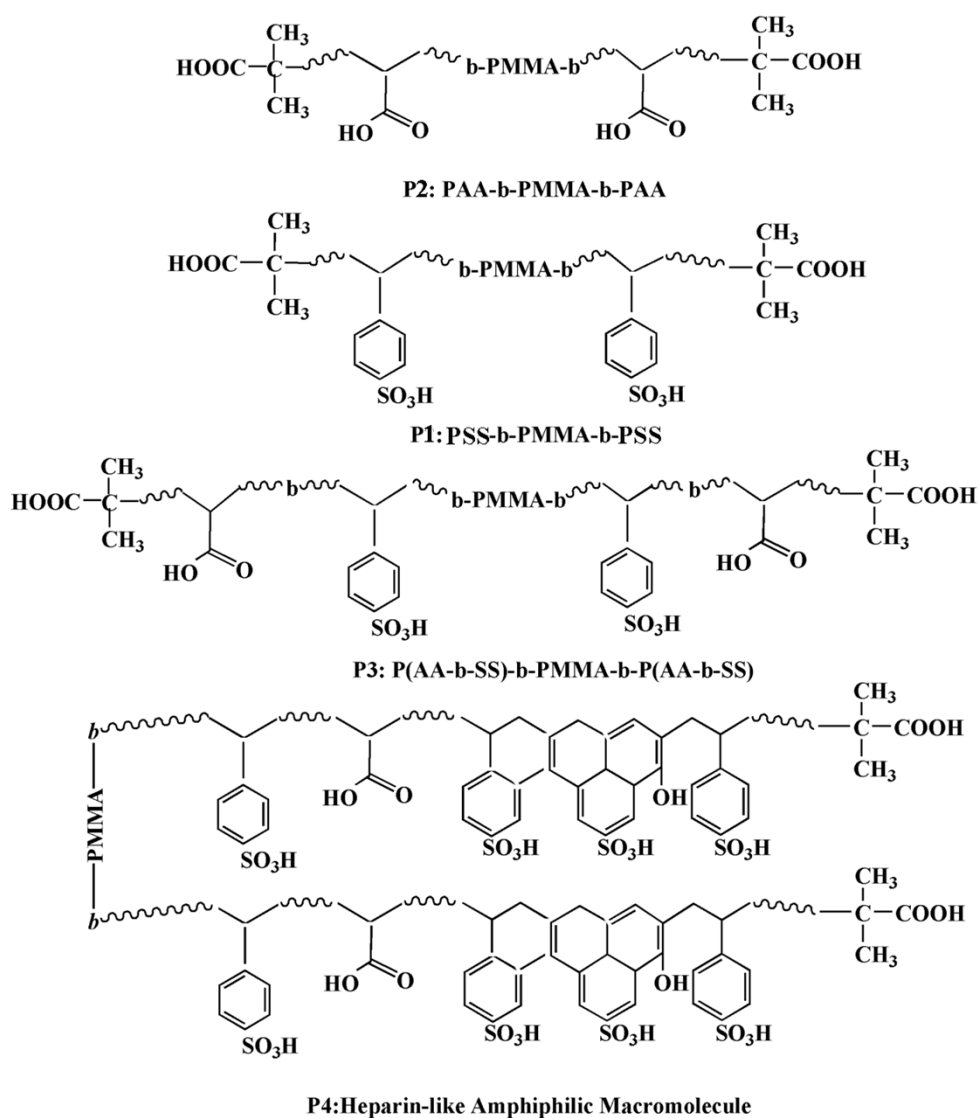

**Figure S1.** The structures of the synthesized block copolymers

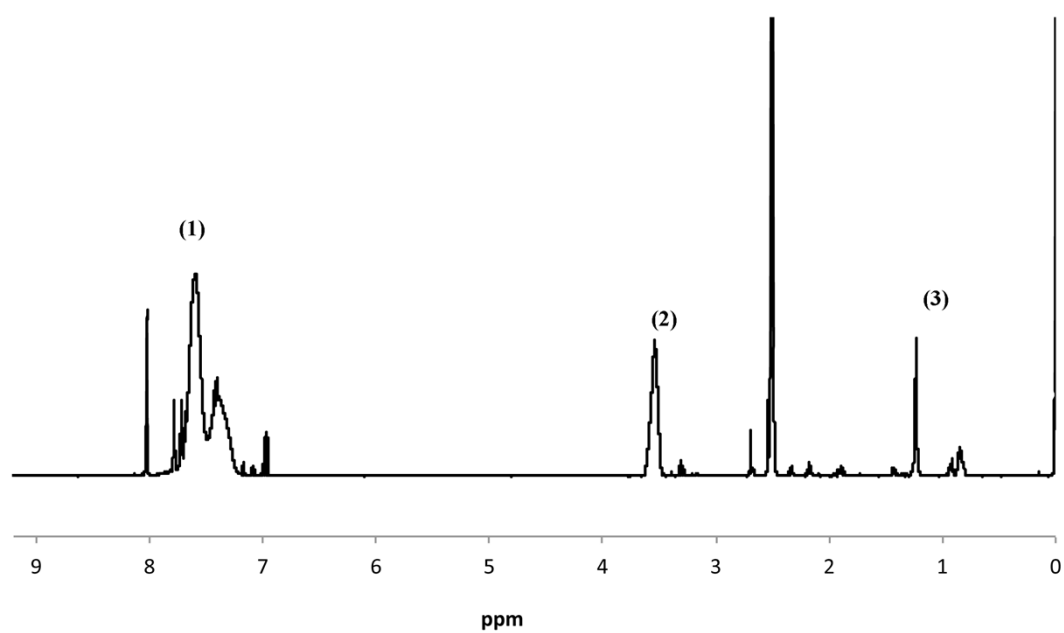

**Figure S2** <sup>1</sup>H NMR spectrum of the P1

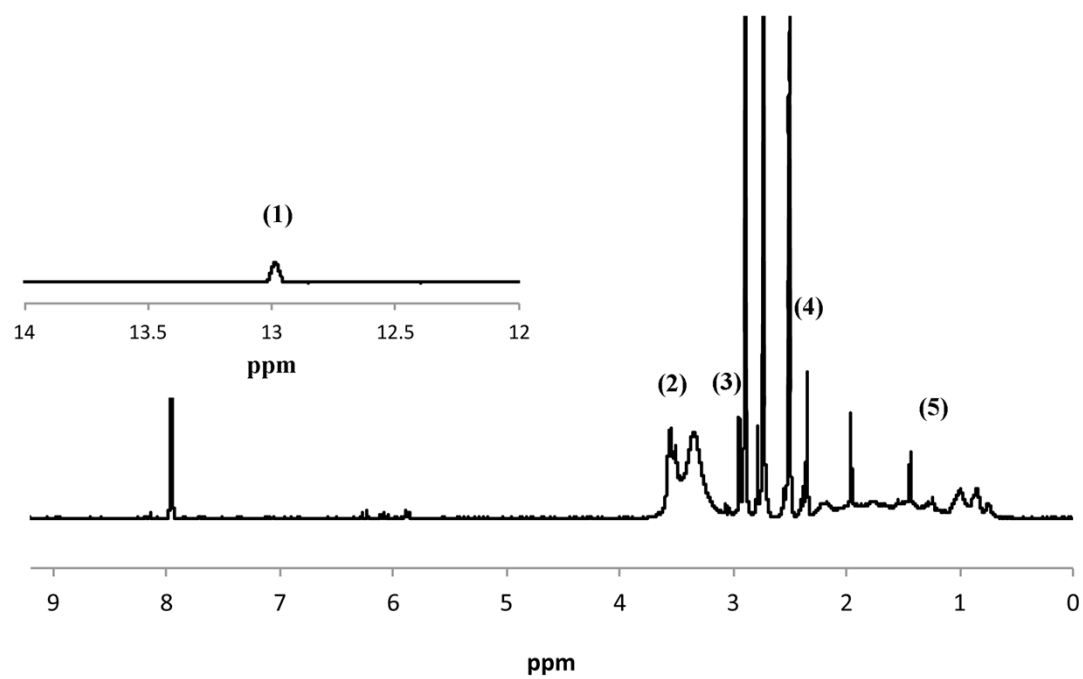

**Figure S3**  $^1\text{H}$  NMR spectrum of the P2

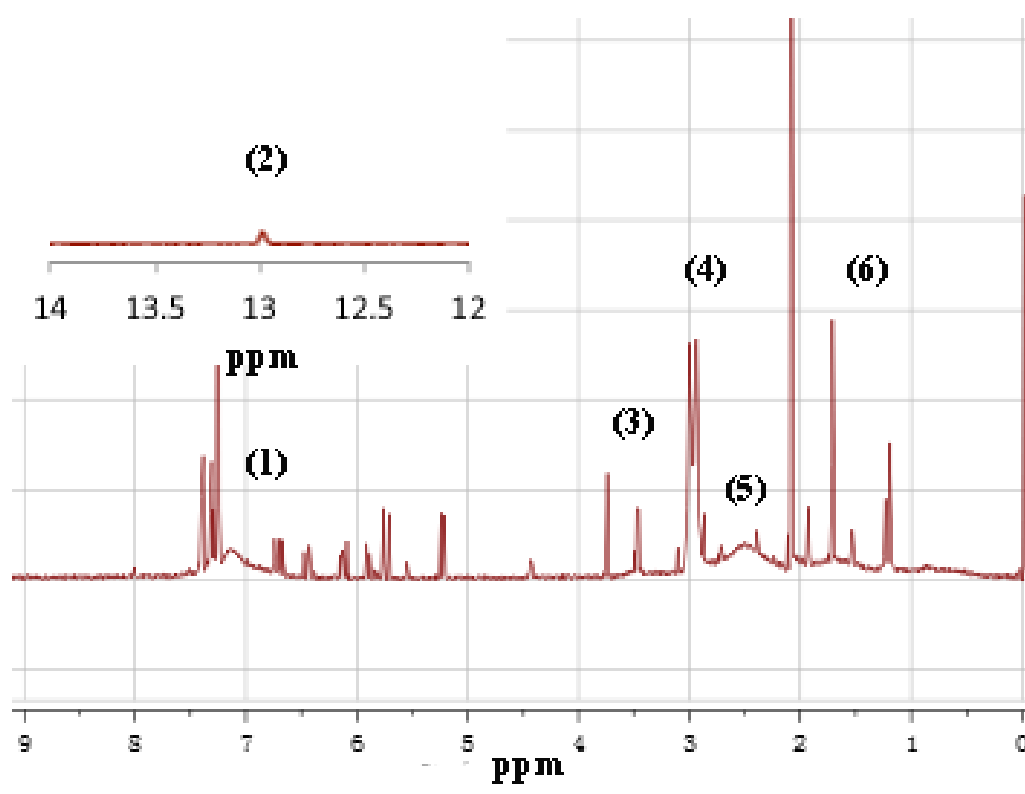

**Figure S4**  $^1\text{H}$  NMR spectrum of the P3

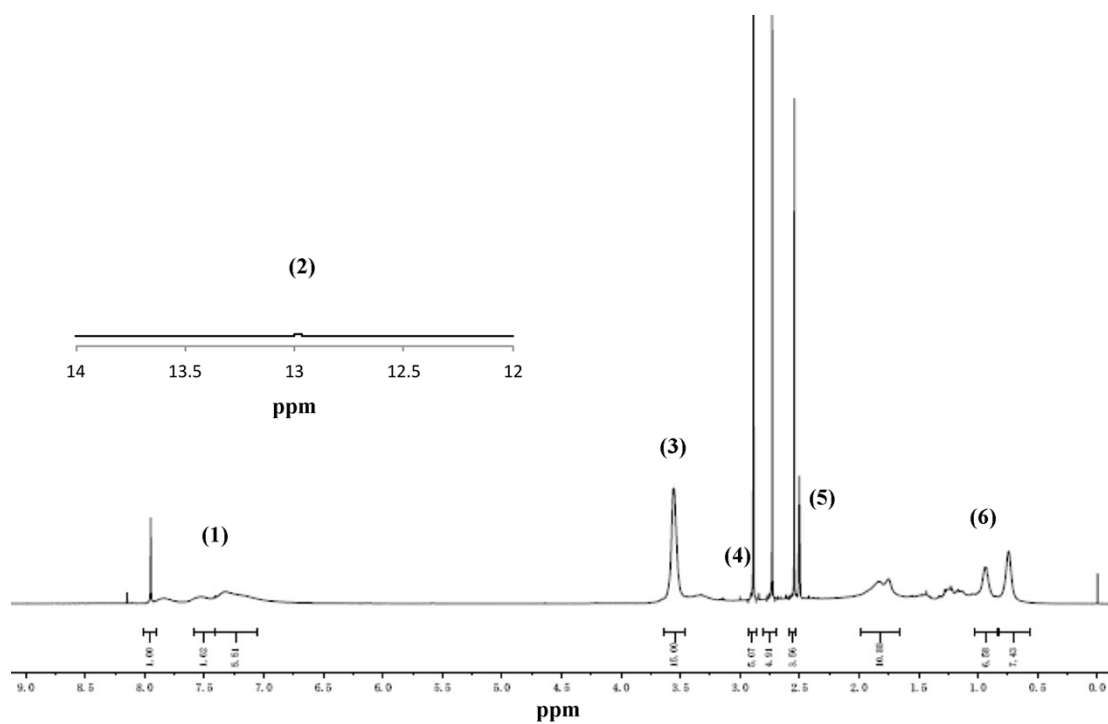

**Figure S5**  $^1\text{H}$  NMR spectrum of the P4

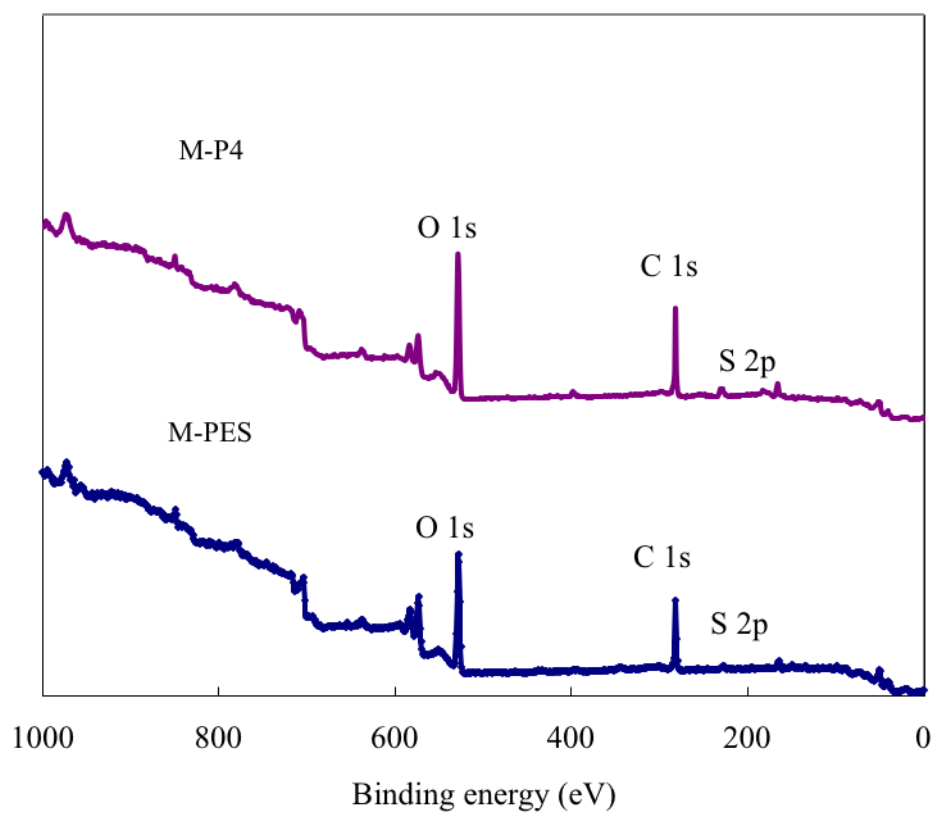

**Figure S6** XPS spectra for the M-PES and M-P4
